# Supplementary material for: Housekeeping gene validation for RT-qPCR studies on synovial fibroblasts derived from healthy and osteoarthritic patients with focus on mechanical loading
Source: PubMed Central journal article supplement (PMC6897414; doi:10.1371/journal.pone.0225790), 2019-12-06

# Collagen-1-alpha-2 mRNA expression relative to

Geometric mean of *EEF1A1/RPLP0*

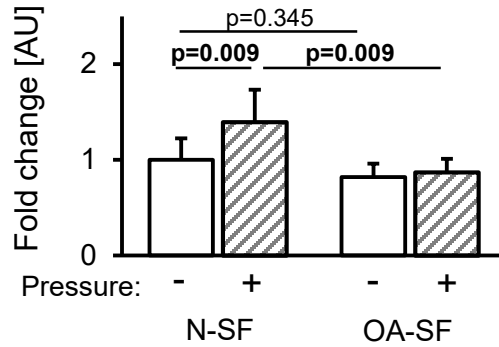

***EEF1A1***

***GAPDH***

***POLR2A***

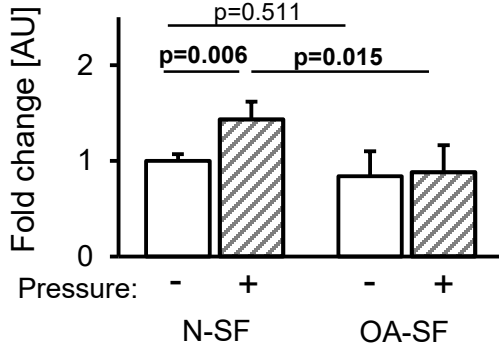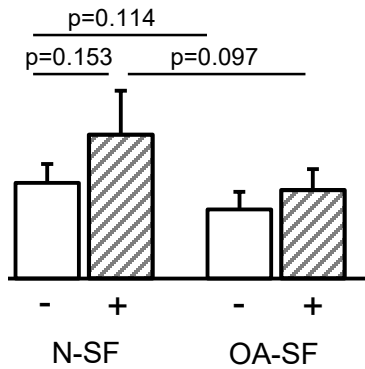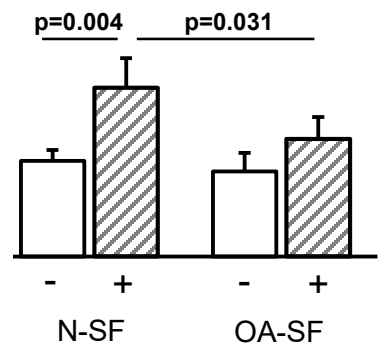

***PPIB***

***RNA18S***

***RPL22***

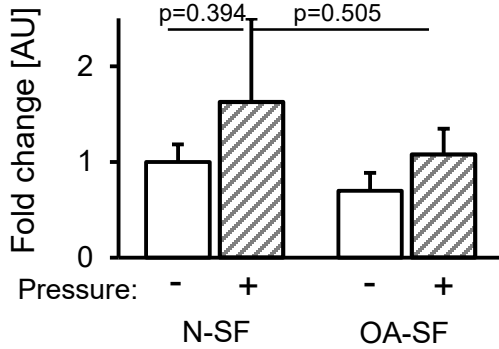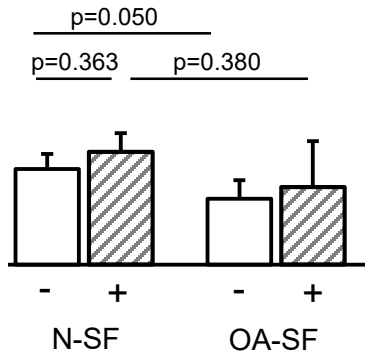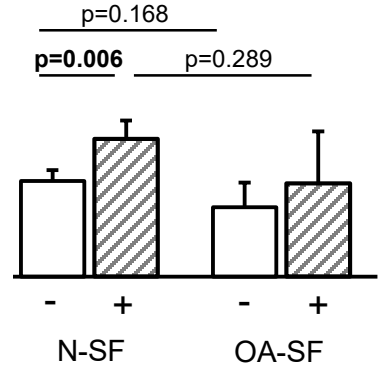

***RPLP0***

***TBP***

***YWHAZ***

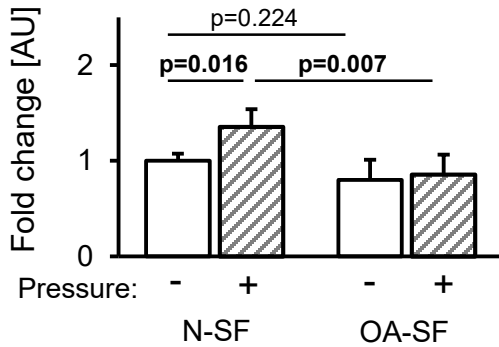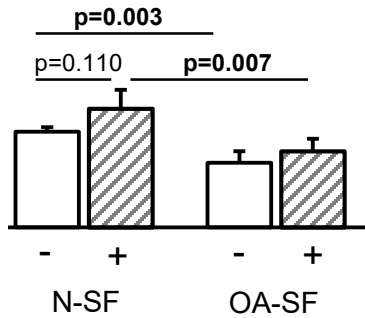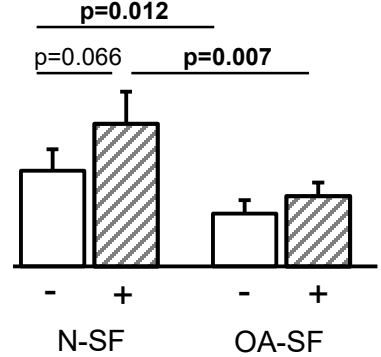

# Cyclooxygenase-2 mRNA expression relative to

## Geometric mean of *EEF1A1*/*RPLP0*

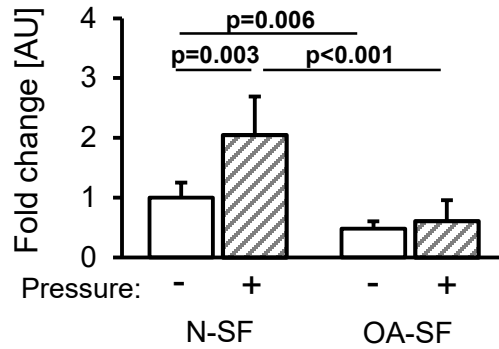

### *EEF1A1*

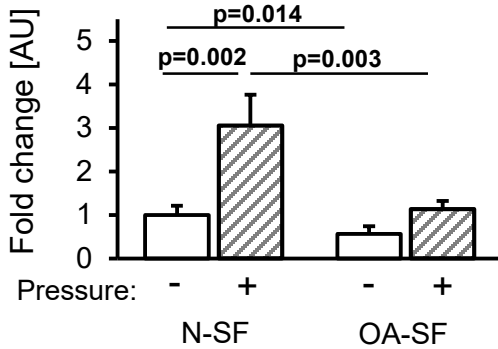

### *GAPDH*

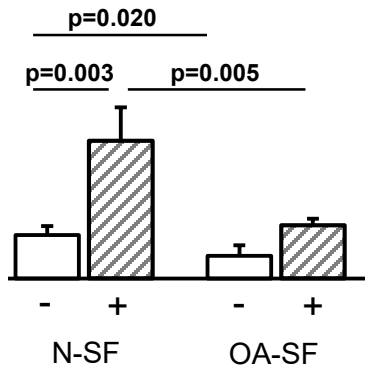

### *POLR2A*

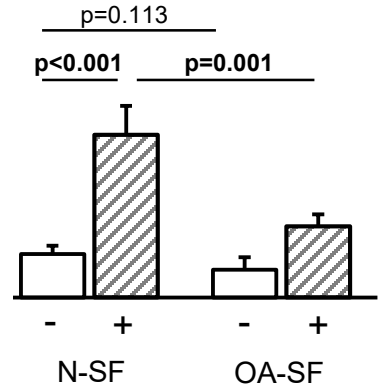

### *PPIB*

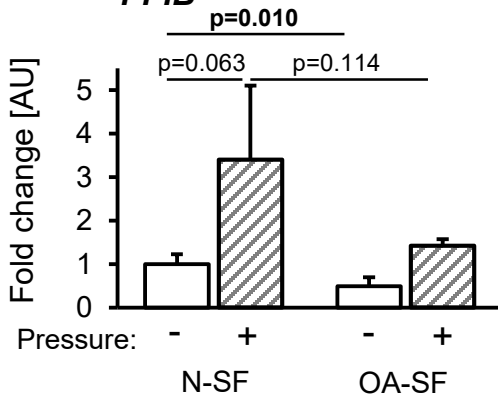

### *RNA18S*

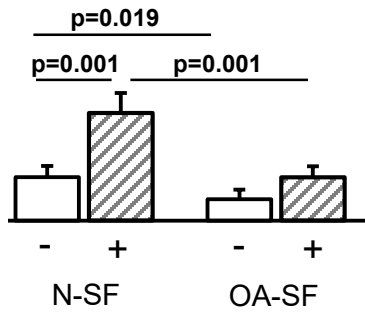

### *RPL22*

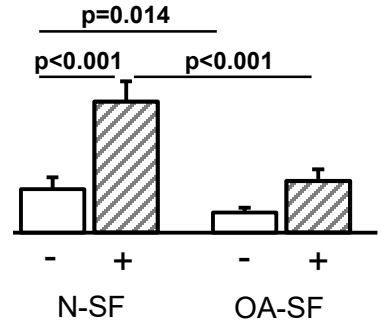

### *RPLP0*

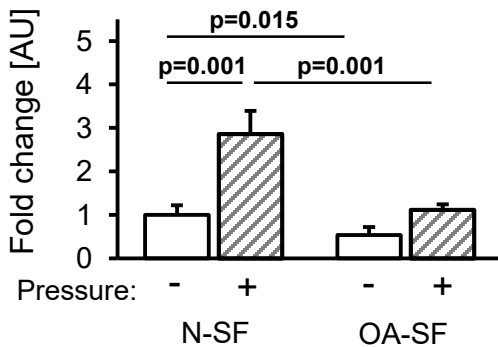

### *TBP*

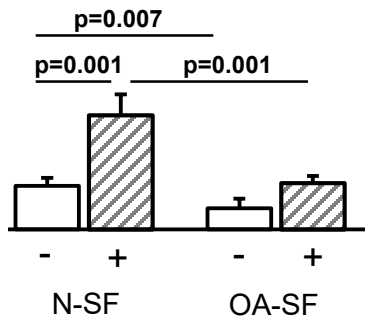

### *YWHAZ*

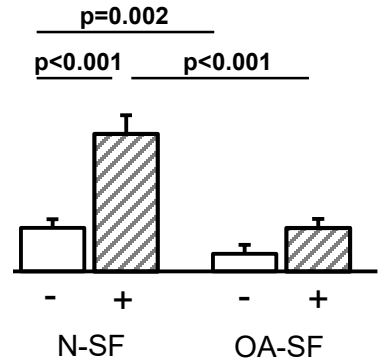

# Interleukin-6 mRNA expression relative to

## Geometric mean of *EEF1A1*/*RPLP0*

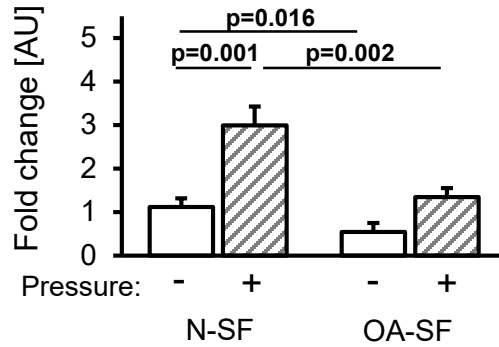

### *EEF1A1*

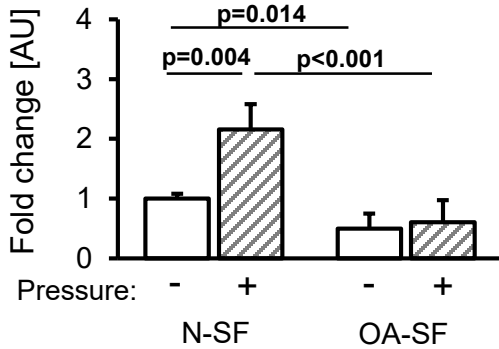

### *GAPDH*

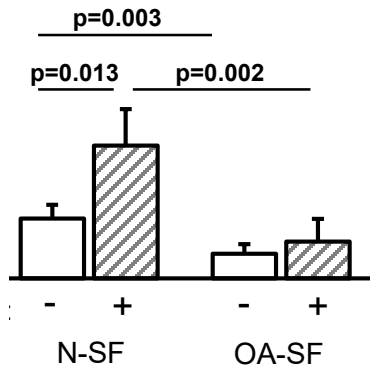

### *POLR2A*

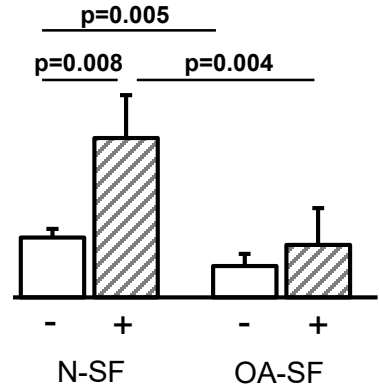

### *PPIB*

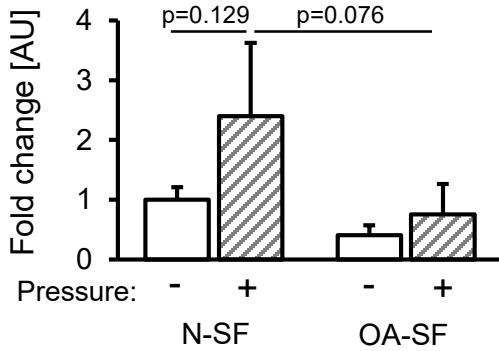

### *RNA18S*

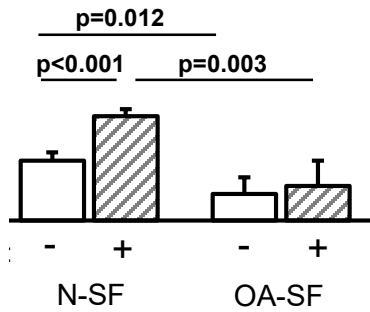

### *RPL22*

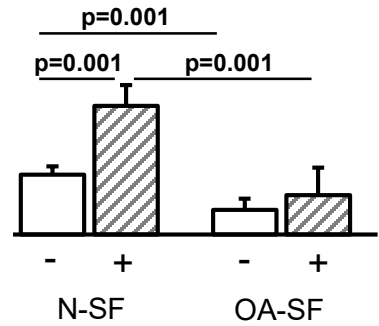

### *RPLP0*

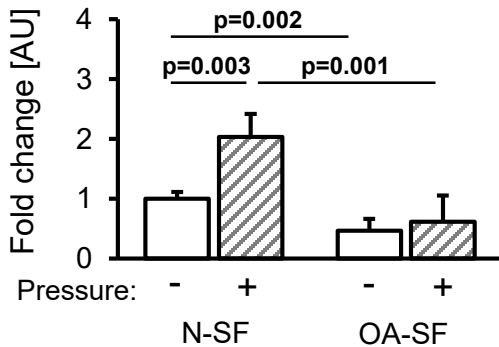

### *TBP*

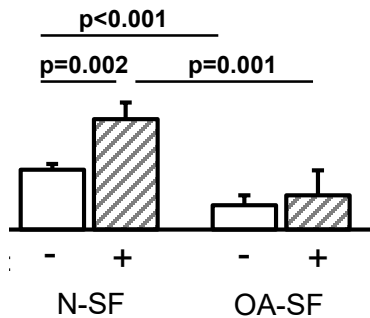

### *YWHAZ*

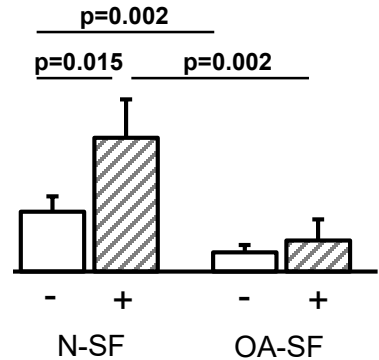

Supplement: pone.0225790.s007.pdf [file pone.0225790.s007.pdf]
