# Supplementary material for: Housekeeping gene validation for RT-qPCR studies on synovial fibroblasts derived from healthy and osteoarthritic patients with focus on mechanical loading
Source: PubMed Central journal article supplement (PMC6897414; doi:10.1371/journal.pone.0225790), 2019-12-06

**Supplementary Data 2. Primer specificity evaluation via (a) agarose gel and (b) melting curve analysis of all used samples (left) and a single sample (right).**

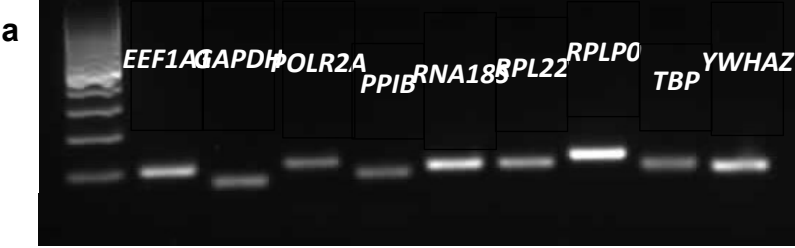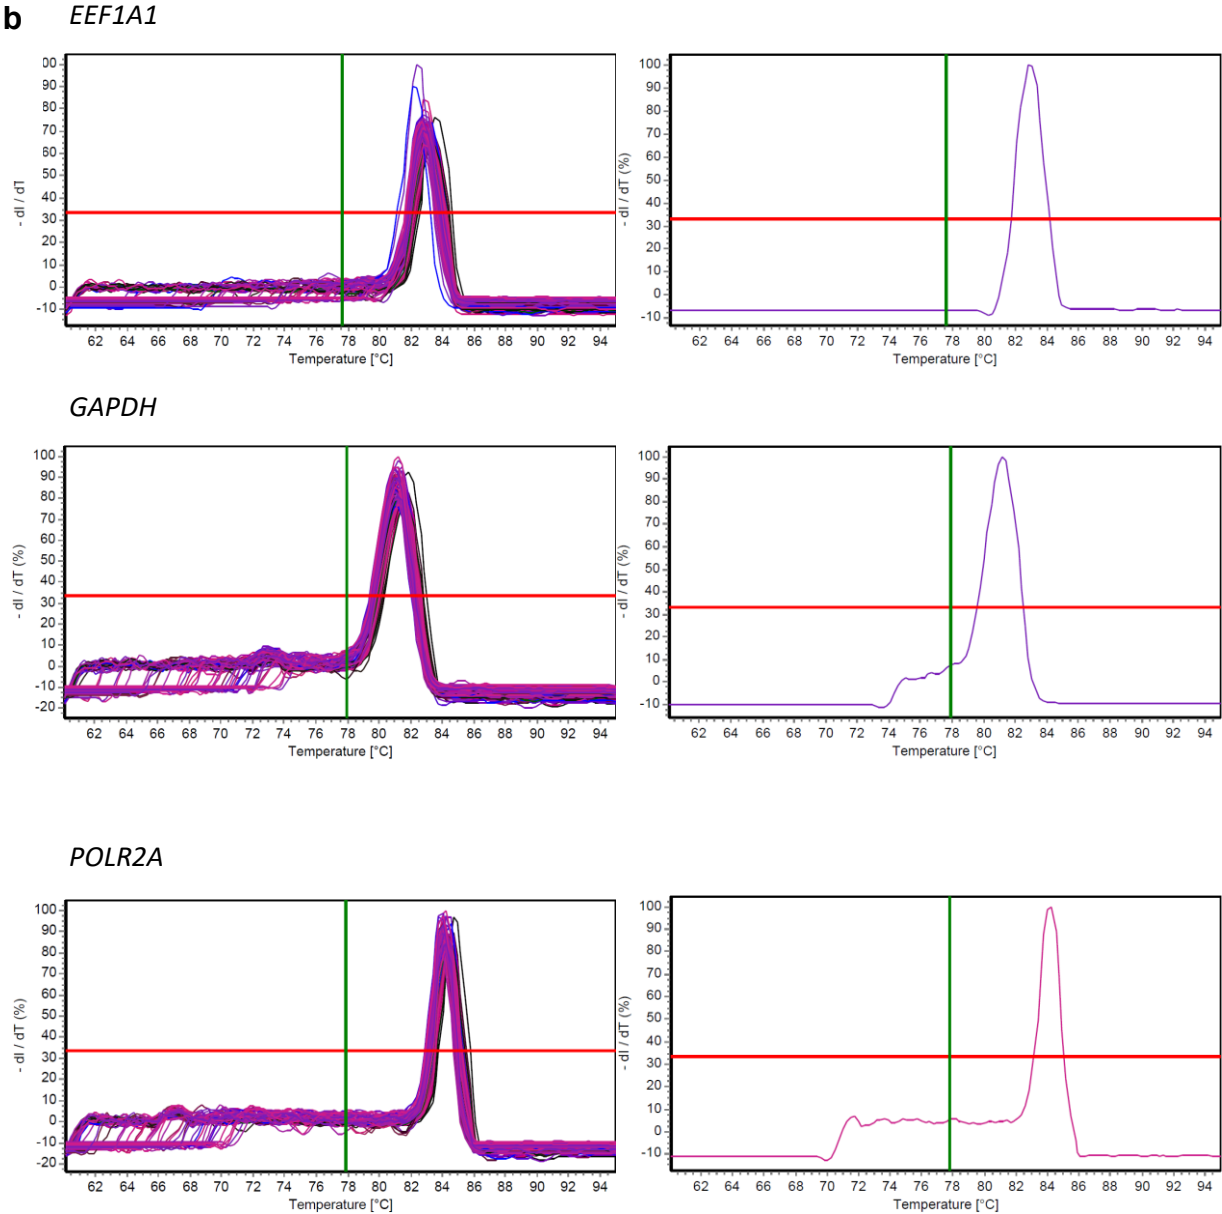

*PPIB*

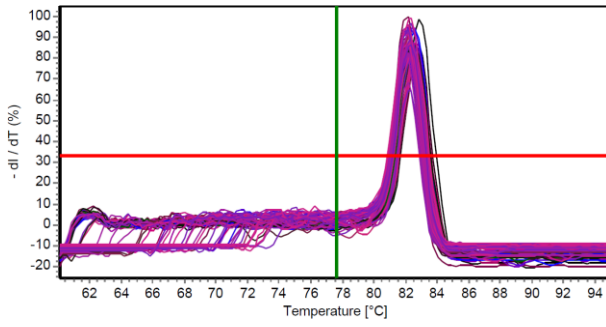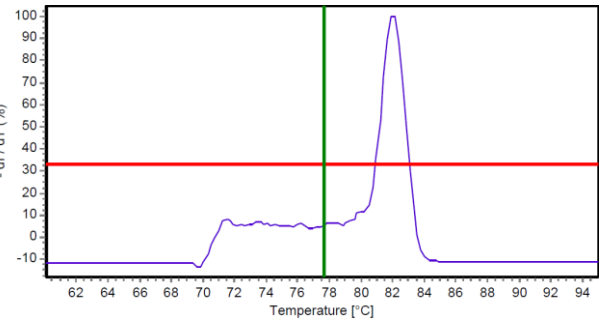

*RPL22*

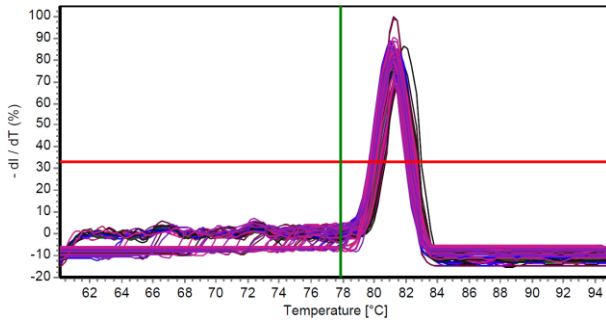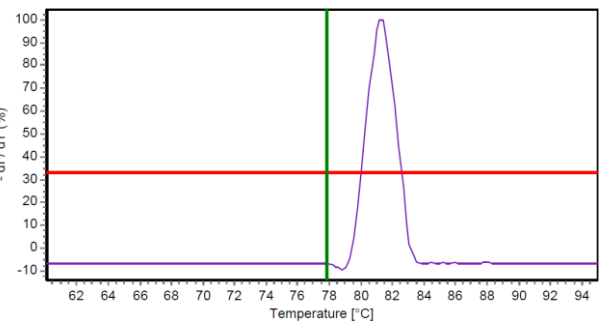

*RPLP0*

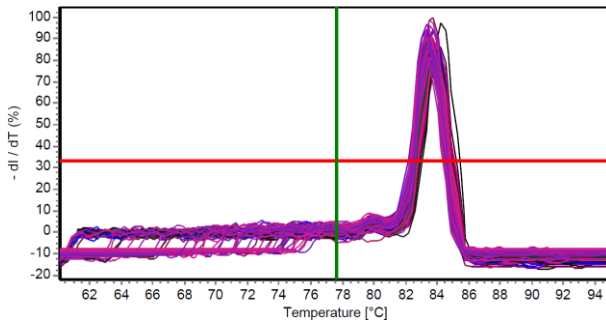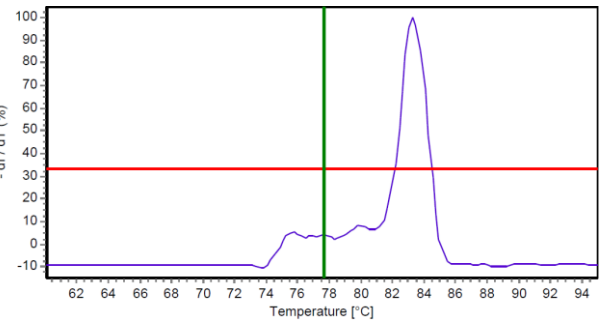

*RNA18S*

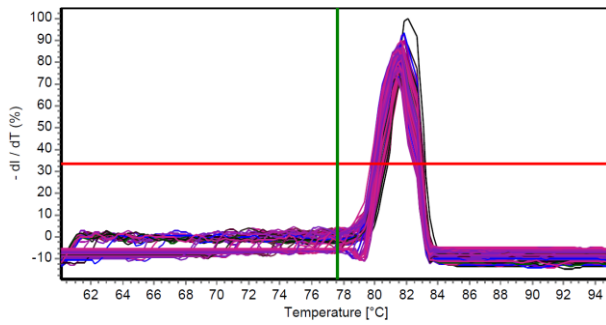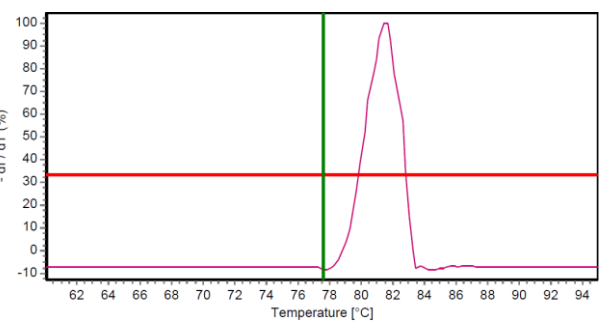

*TBP*

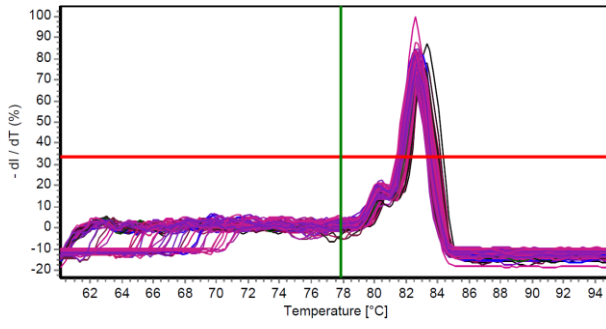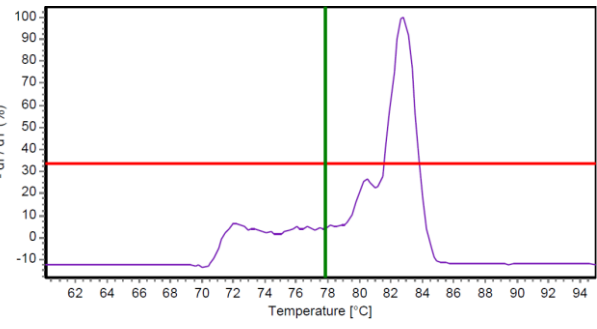

*YWHAZ*

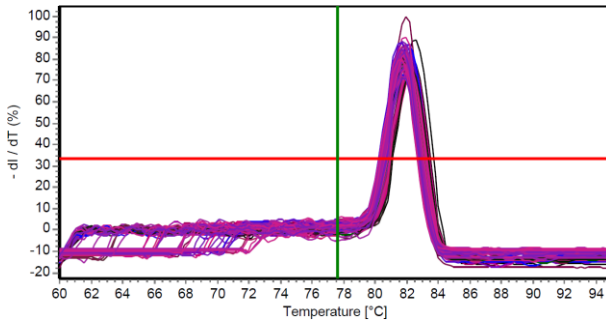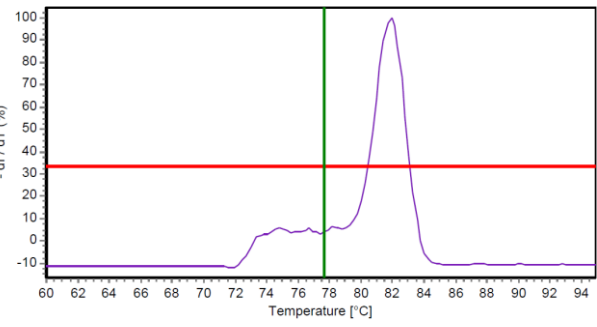

Supplement: pone.0225790.s006.pdf [file pone.0225790.s006.pdf]
