# Supplementary material for: Housekeeping gene validation for RT-qPCR studies on synovial fibroblasts derived from healthy and osteoarthritic patients with focus on mechanical loading
Source: PubMed Central journal article supplement (PMC6897414; doi:10.1371/journal.pone.0225790), 2019-12-06
Supplement: pone.0225790.s005.pdf [file pone.0225790.s005.pdf]

**Electrophoresis File Run Summary (Chip Summary)**

| Sample Name | Sample Comment | Status | Result Label      | Result Color |
|-------------|----------------|--------|-------------------|--------------|
| Sample 1    |                | ✓      | RIN:9             |              |
| Sample 2    |                | ✓      | RIN: 2.90         |              |
| Sample 3    |                | ✓      | RIN: 9.30         |              |
| Sample 4    |                | ✓      | RIN: 6.20         |              |
| Sample 5    |                | ✓      | RIN:9             |              |
| Sample 6    |                | ✓      | RIN: 9.40         |              |
| Sample 7    |                | ✓      | RIN: 9.50         |              |
| Sample 8    |                | ✓      | RIN: 9.30         |              |
| Sample 9    |                | ✓      | RIN: 9.40         |              |
| Sample 10   |                | ✓      | RIN N/A           |              |
| Sample 11   |                | ✓      | RIN: 9.20         |              |
| Sample 12   |                | ✓      | RIN: 9.30         |              |
| Ladder      |                | ✓      | All Other Samples |              |

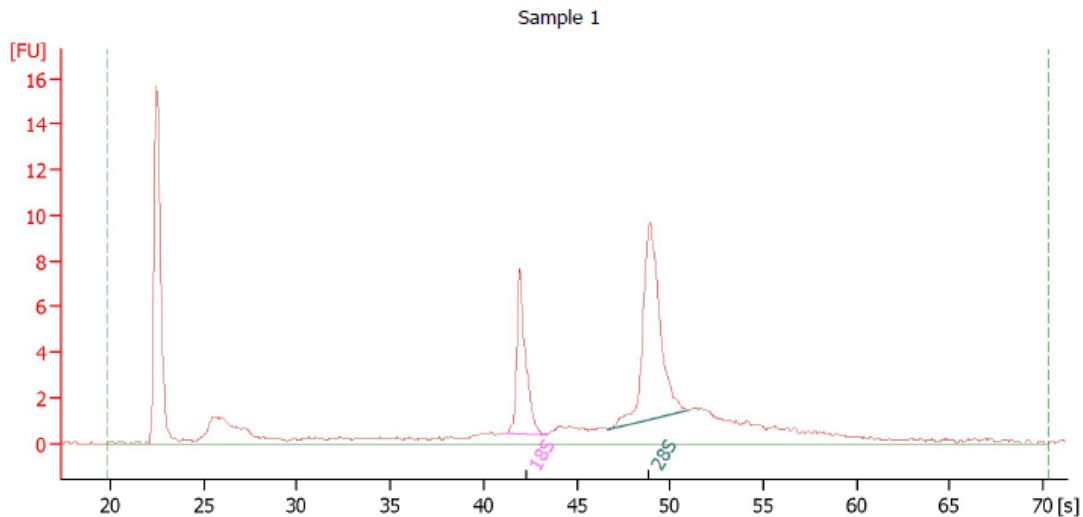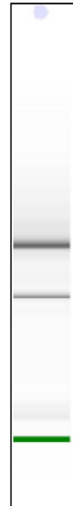

**Overall Results for sample 1 : Sample 1**

|                         |          |                             |                                                                                                                             |
|-------------------------|----------|-----------------------------|-----------------------------------------------------------------------------------------------------------------------------|
| RNA Area:               | 78,4     | RNA Integrity Number (RIN): | 9 (B.02.08)                                                                                                                 |
| RNA Concentration:      | 31 ng/μl | Result Flagging Color:      | <span style="background-color: #ccccff; border: 1px solid black; display: inline-block; width: 20px; height: 10px;"></span> |
| rRNA Ratio [28s / 18s]: | 2,0      | Result Flagging Label:      | RIN:9                                                                                                                       |

**Fragment table for sample 1 : Sample 1**

| Name | Start Time [s] | End Time [s] | Area | % of total Area |
|------|----------------|--------------|------|-----------------|
| 18S  | 41,23          | 43,42        | 9,3  | 11,9            |
| 28S  | 46,63          | 51,01        | 18,8 | 23,9            |

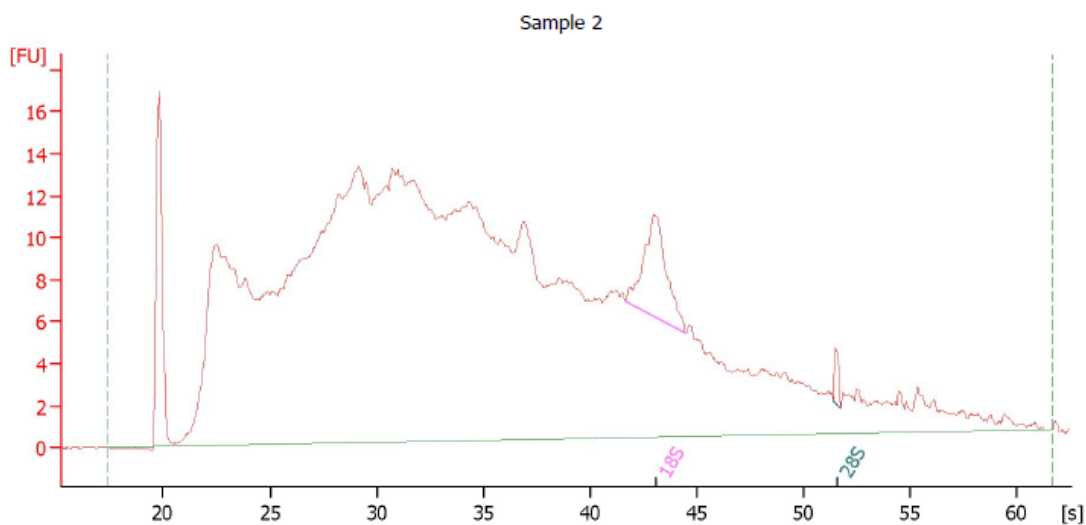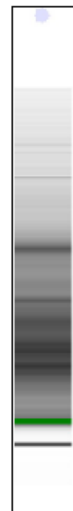

**Overall Results for sample 2 : Sample 2**

|                         |           |                             |                                                                                                                             |
|-------------------------|-----------|-----------------------------|-----------------------------------------------------------------------------------------------------------------------------|
| RNA Area:               | 685,0     | RNA Integrity Number (RIN): | 2.9 (B.02.08)                                                                                                               |
| RNA Concentration:      | 275 ng/μl | Result Flagging Color:      | <span style="background-color: #ccccff; border: 1px solid black; display: inline-block; width: 20px; height: 10px;"></span> |
| rRNA Ratio [28s / 18s]: | 0,1       | Result Flagging Label:      | RIN: 2.90                                                                                                                   |

**Fragment table for sample 2 : Sample 2**

| Name | Start Time [s] | End Time [s] | Area | % of total Area |
|------|----------------|--------------|------|-----------------|
| 18S  | 41,65          | 44,46        | 13,9 | 2,0             |
| 28S  | 51,38          | 51,74        | 1,0  | 0,1             |

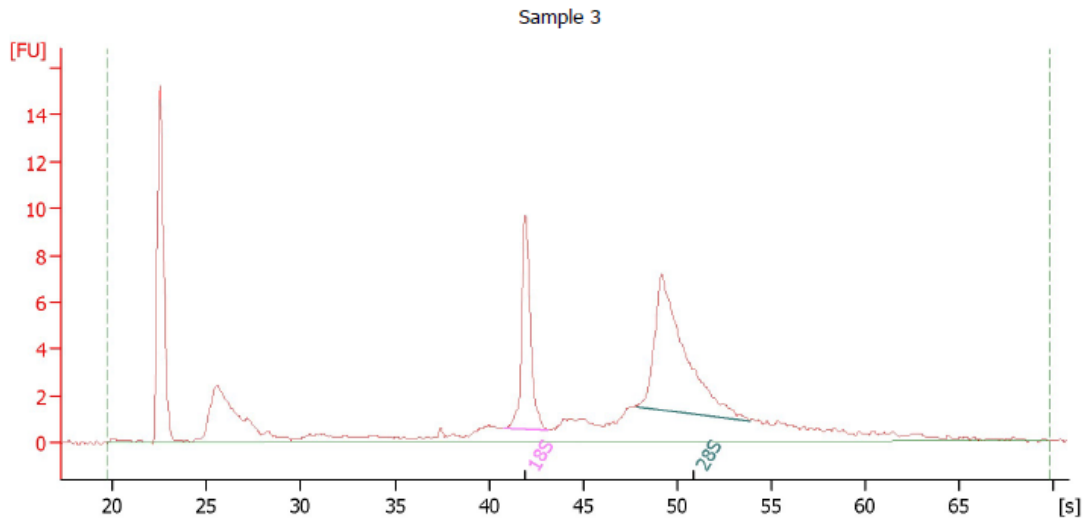

**Overall Results for sample 3 :** Sample 3

|                         |                |                             |                                                                                                                             |
|-------------------------|----------------|-----------------------------|-----------------------------------------------------------------------------------------------------------------------------|
| RNA Area:               | 96,3           | RNA Integrity Number (RIN): | 9.3 (B.02.08)                                                                                                               |
| RNA Concentration:      | 39 ng/ $\mu$ l | Result Flagging Color:      | <span style="background-color: #ccccff; border: 1px solid black; display: inline-block; width: 20px; height: 10px;"></span> |
| rRNA Ratio [28s / 18s]: | 1,8            | Result Flagging Label:      | RIN: 9.30                                                                                                                   |

**Fragment table for sample 3 :** Sample 3

| Name | Start Time [s] | End Time [s] | Area | % of total Area |
|------|----------------|--------------|------|-----------------|
| 18S  | 40,80          | 43,18        | 11,6 | 12,0            |
| 28S  | 47,83          | 53,85        | 21,3 | 22,1            |

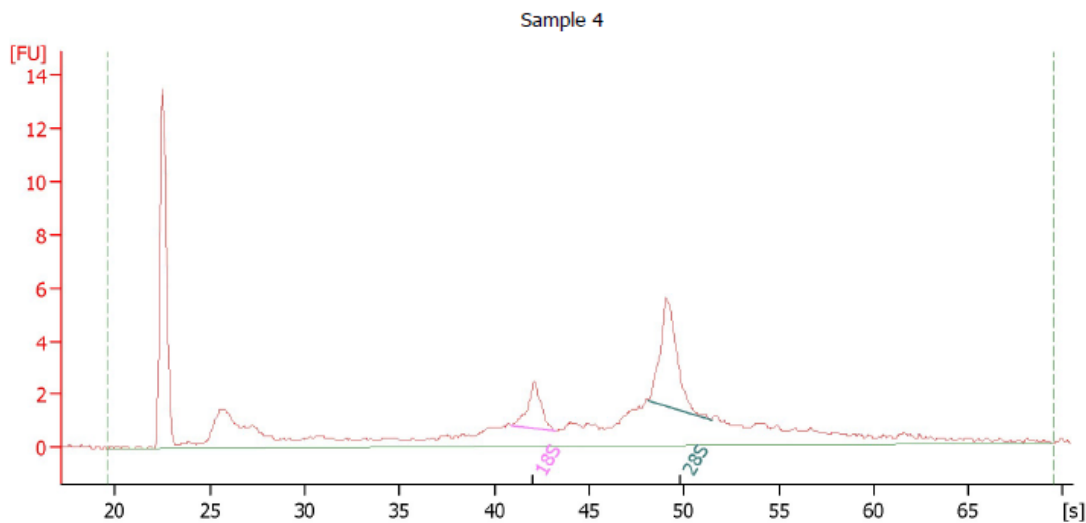

**Overall Results for sample 4 :** Sample 4

|                         |                |                             |                                                                                                                             |
|-------------------------|----------------|-----------------------------|-----------------------------------------------------------------------------------------------------------------------------|
| RNA Area:               | 71,6           | RNA Integrity Number (RIN): | 6.2 (B.02.08)                                                                                                               |
| RNA Concentration:      | 29 ng/ $\mu$ l | Result Flagging Color:      | <span style="background-color: #ccccff; border: 1px solid black; display: inline-block; width: 20px; height: 10px;"></span> |
| rRNA Ratio [28s / 18s]: | 2,4            | Result Flagging Label:      | RIN: 6.20                                                                                                                   |

**Fragment table for sample 4 :** Sample 4

| Name | Start Time [s] | End Time [s] | Area | % of total Area |
|------|----------------|--------------|------|-----------------|
| 18S  | 40,92          | 43,24        | 3,4  | 4,7             |
| 28S  | 48,12          | 51,44        | 8,3  | 11,6            |

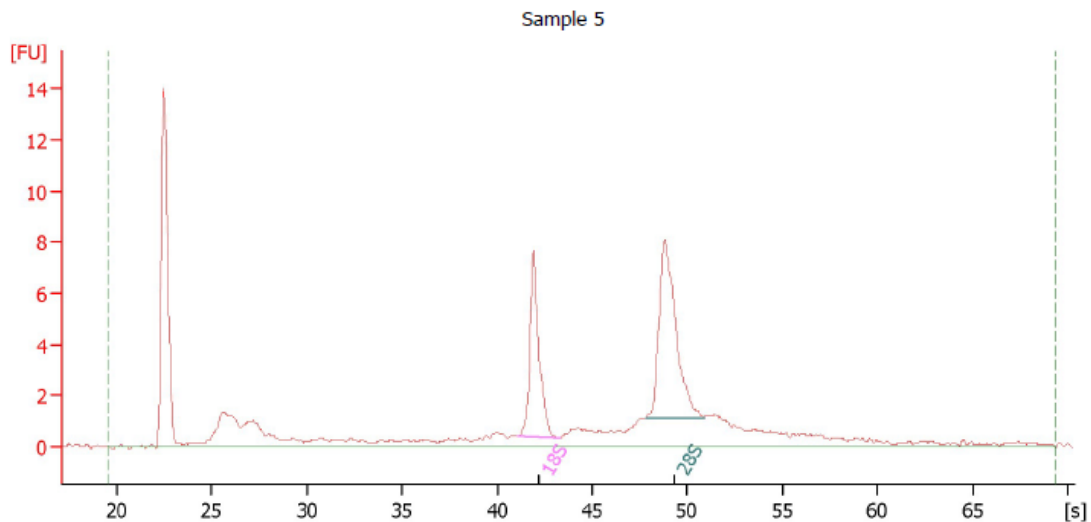

**Overall Results for sample 5 : Sample 5**

|                         |                |                             |                                                                                                                             |
|-------------------------|----------------|-----------------------------|-----------------------------------------------------------------------------------------------------------------------------|
| RNA Area:               | 71,9           | RNA Integrity Number (RIN): | 9 (B.02.08)                                                                                                                 |
| RNA Concentration:      | 29 ng/ $\mu$ l | Result Flagging Color:      | <span style="background-color: #ccccff; border: 1px solid black; display: inline-block; width: 20px; height: 10px;"></span> |
| rRNA Ratio [28s / 18s]: | 1,5            | Result Flagging Label:      | RIN:9                                                                                                                       |

**Fragment table for sample 5 : Sample 5**

| Name | Start Time [s] | End Time [s] | Area | % of total Area |
|------|----------------|--------------|------|-----------------|
| 18S  | 41,08          | 43,29        | 9,7  | 13,4            |
| 28S  | 47,81          | 50,88        | 14,6 | 20,3            |

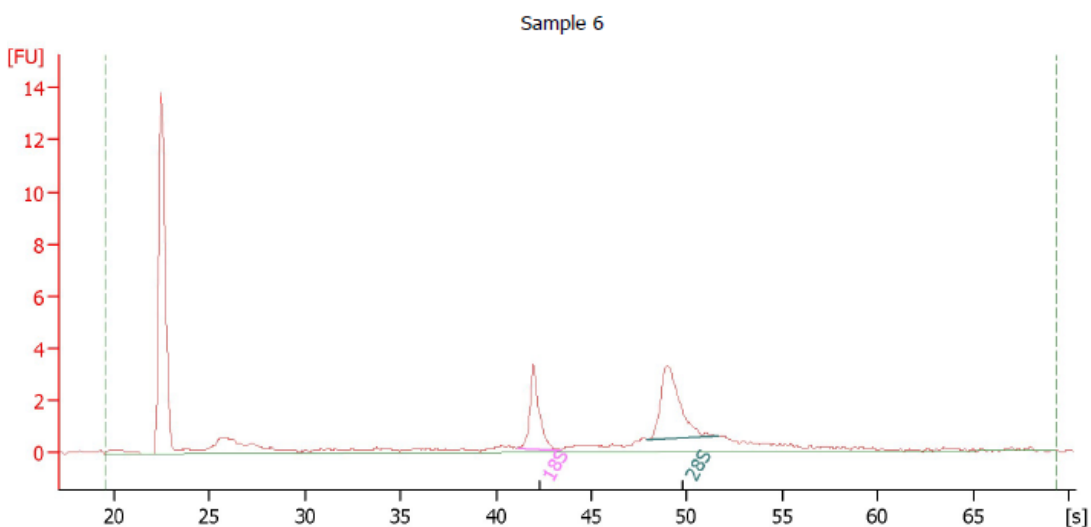

**Overall Results for sample 6 : Sample 6**

|                         |                |                             |                                                                                                                             |
|-------------------------|----------------|-----------------------------|-----------------------------------------------------------------------------------------------------------------------------|
| RNA Area:               | 34,0           | RNA Integrity Number (RIN): | 9.4 (B.02.08)                                                                                                               |
| RNA Concentration:      | 14 ng/ $\mu$ l | Result Flagging Color:      | <span style="background-color: #ccccff; border: 1px solid black; display: inline-block; width: 20px; height: 10px;"></span> |
| rRNA Ratio [28s / 18s]: | 1,6            | Result Flagging Label:      | RIN: 9.40                                                                                                                   |

**Fragment table for sample 6 : Sample 6**

| Name | Start Time [s] | End Time [s] | Area | % of total Area |
|------|----------------|--------------|------|-----------------|
| 18S  | 41,13          | 43,39        | 4,3  | 12,7            |
| 28S  | 47,91          | 51,63        | 6,8  | 19,9            |

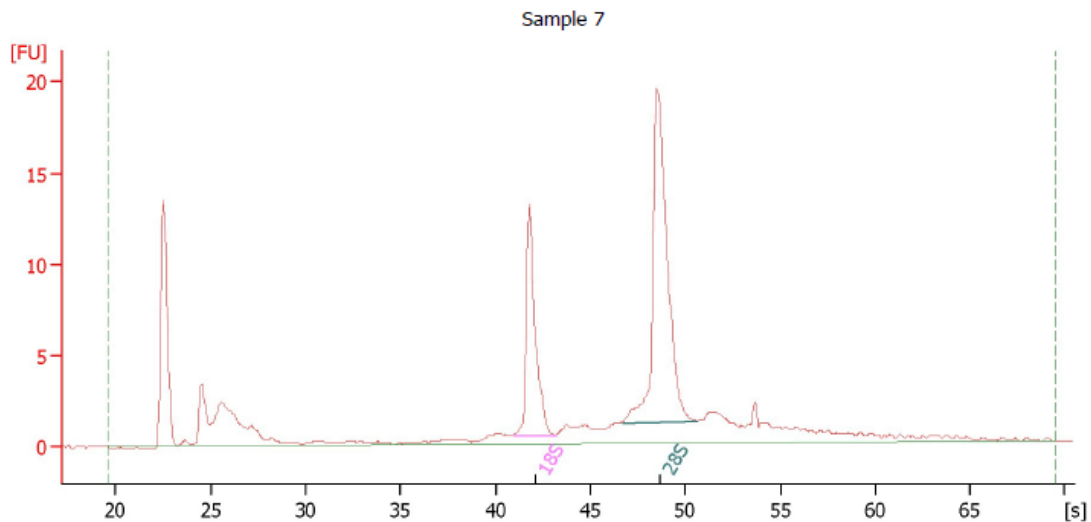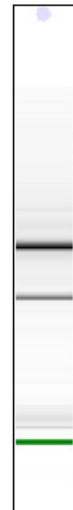

**Overall Results for sample 7 : Sample 7**

|                         |                |                             |                                                                                                                             |
|-------------------------|----------------|-----------------------------|-----------------------------------------------------------------------------------------------------------------------------|
| RNA Area:               | 115,9          | RNA Integrity Number (RIN): | 9.5 (B.02.08)                                                                                                               |
| RNA Concentration:      | 47 ng/ $\mu$ l | Result Flagging Color:      | <span style="background-color: #ccccff; border: 1px solid black; display: inline-block; width: 20px; height: 10px;"></span> |
| rRNA Ratio [28s / 18s]: | 2,1            | Result Flagging Label:      | RIN: 9.50                                                                                                                   |

**Fragment table for sample 7 : Sample 7**

| Name | Start Time [s] | End Time [s] | Area | % of total Area |
|------|----------------|--------------|------|-----------------|
| 18S  | 40,97          | 43,19        | 15,6 | 13,5            |
| 28S  | 46,66          | 50,64        | 33,1 | 28,5            |

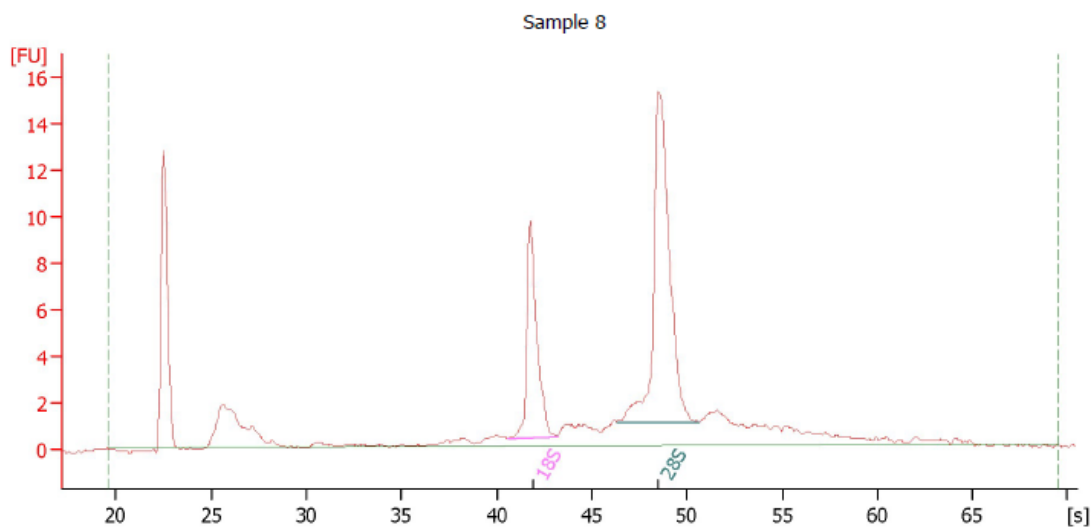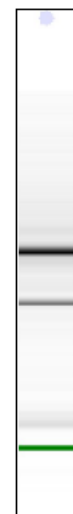

**Overall Results for sample 8 : Sample 8**

|                         |                |                             |                                                                                                                             |
|-------------------------|----------------|-----------------------------|-----------------------------------------------------------------------------------------------------------------------------|
| RNA Area:               | 90,6           | RNA Integrity Number (RIN): | 9.3 (B.02.08)                                                                                                               |
| RNA Concentration:      | 36 ng/ $\mu$ l | Result Flagging Color:      | <span style="background-color: #ccccff; border: 1px solid black; display: inline-block; width: 20px; height: 10px;"></span> |
| rRNA Ratio [28s / 18s]: | 2,2            | Result Flagging Label:      | RIN: 9.30                                                                                                                   |

**Fragment table for sample 8 : Sample 8**

| Name | Start Time [s] | End Time [s] | Area | % of total Area |
|------|----------------|--------------|------|-----------------|
| 18S  | 40,62          | 43,19        | 13,1 | 14,4            |
| 28S  | 46,31          | 50,64        | 28,4 | 31,3            |

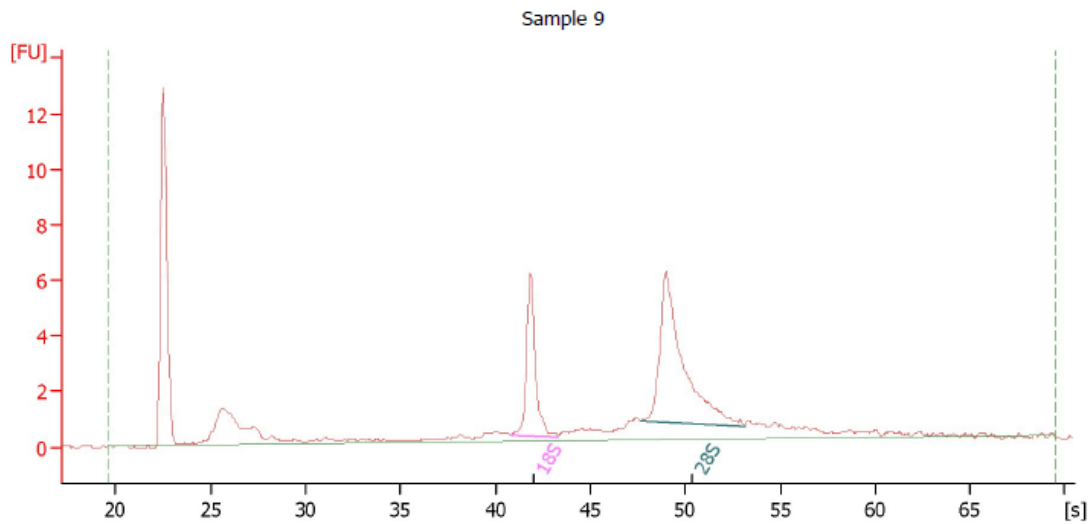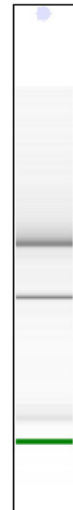

**Overall Results for sample 9 :** Sample 9

|                         |                |                             |                                                                                                                             |
|-------------------------|----------------|-----------------------------|-----------------------------------------------------------------------------------------------------------------------------|
| RNA Area:               | 53,9           | RNA Integrity Number (RIN): | 9.4 (B.02.08)                                                                                                               |
| RNA Concentration:      | 22 ng/ $\mu$ l | Result Flagging Color:      | <span style="background-color: #ccccff; border: 1px solid black; display: inline-block; width: 20px; height: 10px;"></span> |
| rRNA Ratio [28s / 18s]: | 2,1            | Result Flagging Label:      | RIN: 9.40                                                                                                                   |

**Fragment table for sample 9 :** Sample 9

| Name | Start Time [s] | End Time [s] | Area | % of total Area |
|------|----------------|--------------|------|-----------------|
| 18S  | 40,82          | 43,29        | 7,1  | 13,2            |
| 28S  | 47,67          | 53,15        | 15,2 | 28,2            |

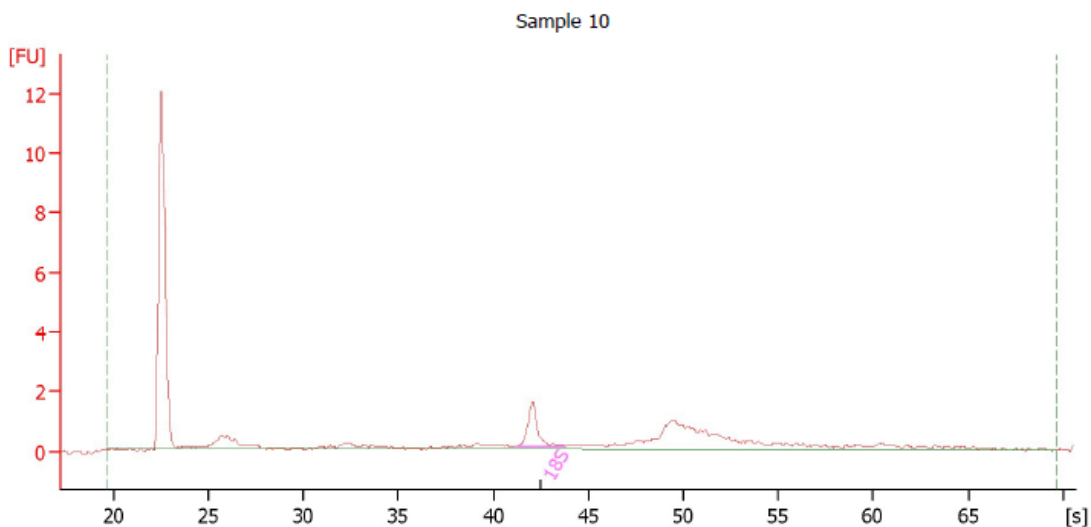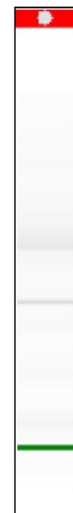

**Overall Results for sample 10 :** Sample 10

|                         |               |                             |                                                                                                                             |
|-------------------------|---------------|-----------------------------|-----------------------------------------------------------------------------------------------------------------------------|
| RNA Area:               | 19,7          | RNA Integrity Number (RIN): | N/A (B.02.08)                                                                                                               |
| RNA Concentration:      | 8 ng/ $\mu$ l | Result Flagging Color:      | <span style="background-color: #cccccc; border: 1px solid black; display: inline-block; width: 20px; height: 10px;"></span> |
| rRNA Ratio [28s / 18s]: | 0,0           | Result Flagging Label:      | RIN N/A                                                                                                                     |

**Fragment table for sample 10 :** Sample 10

| Name | Start Time [s] | End Time [s] | Area | % of total Area |
|------|----------------|--------------|------|-----------------|
| 18S  | 41,17          | 43,84        | 2,1  | 10,6            |

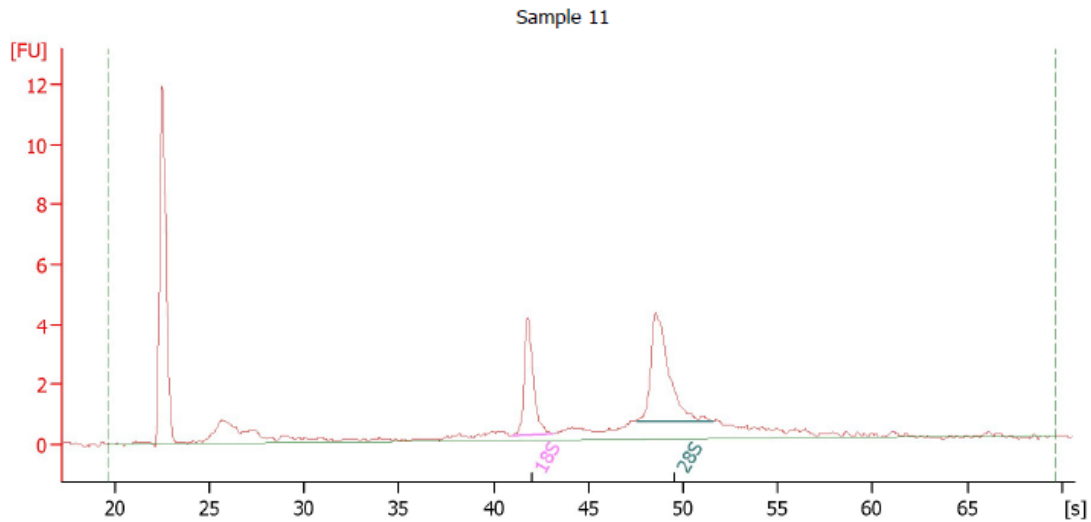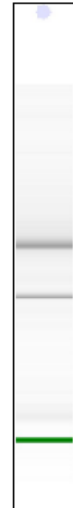

**Overall Results for sample 11 : Sample 11**

|                         |                |                             |                                                                                                                             |
|-------------------------|----------------|-----------------------------|-----------------------------------------------------------------------------------------------------------------------------|
| RNA Area:               | 38,2           | RNA Integrity Number (RIN): | 9.2 (B.02.08)                                                                                                               |
| RNA Concentration:      | 15 ng/ $\mu$ l | Result Flagging Color:      | <span style="border: 1px solid black; background-color: #ccccff; display: inline-block; width: 20px; height: 10px;"></span> |
| rRNA Ratio [28s / 18s]: | 1,6            | Result Flagging Label:      | RIN: 9.20                                                                                                                   |

**Fragment table for sample 11 : Sample 11**

| Name | Start Time [s] | End Time [s] | Area | % of total Area |
|------|----------------|--------------|------|-----------------|
| 18S  | 41,01          | 43,13        | 5,0  | 13,1            |
| 28S  | 47,52          | 51,56        | 8,2  | 21,6            |

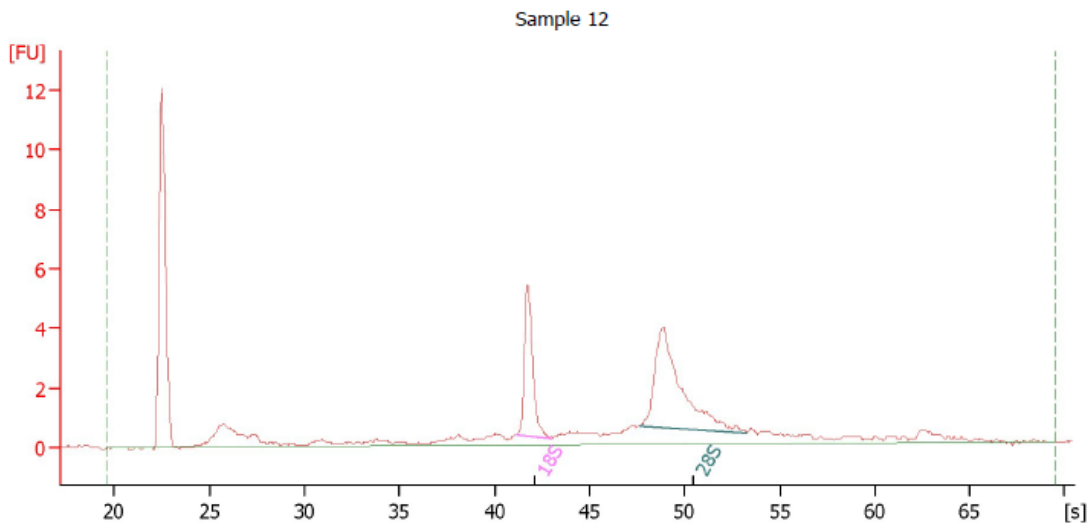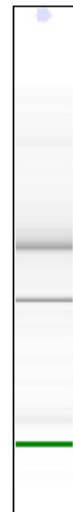

**Overall Results for sample 12 : Sample 12**

|                         |                |                             |                                                                                                                             |
|-------------------------|----------------|-----------------------------|-----------------------------------------------------------------------------------------------------------------------------|
| RNA Area:               | 46,1           | RNA Integrity Number (RIN): | 9.3 (B.02.08)                                                                                                               |
| RNA Concentration:      | 19 ng/ $\mu$ l | Result Flagging Color:      | <span style="border: 1px solid black; background-color: #ccccff; display: inline-block; width: 20px; height: 10px;"></span> |
| rRNA Ratio [28s / 18s]: | 1,8            | Result Flagging Label:      | RIN: 9.30                                                                                                                   |

**Fragment table for sample 12 : Sample 12**

| Name | Start Time [s] | End Time [s] | Area | % of total Area |
|------|----------------|--------------|------|-----------------|
| 18S  | 41,12          | 43,09        | 5,9  | 12,9            |
| 28S  | 47,62          | 53,31        | 10,9 | 23,6            |



# Experiment: hSF06

## Electrophoresis File Run Summary

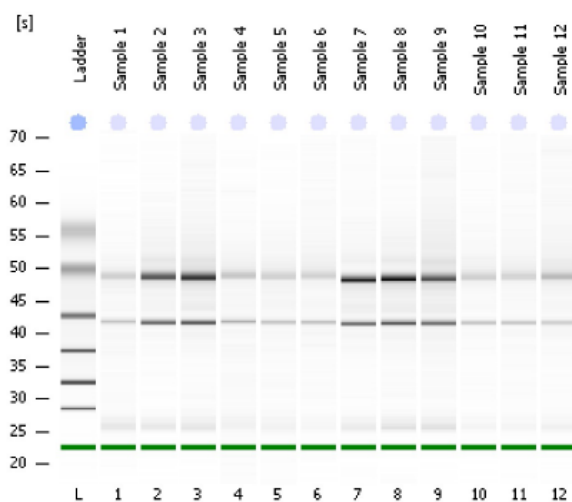

### Instrument Information:

Instrument Name: DE72901710      Firmware: C.01.069  
 Serial#: DE72901710      Type: G2939A

### Assay Information:

Assay Origin Path: C:\Programme\Agilent\2100 bioanalyzer\2100 expert\assays\RNA\Eukaryote Total RNA Nano Series II.xsy  
 Assay Class: Eukaryote Total RNA Nano  
 Version: 2.6  
 Assay Comments: Total RNA Analysis ng sensitivity (Eukaryote)  
 © Copyright 2003 - 2009 Agilent Technologies, Inc.

### Chip Information:

Chip Lot #:  
 Reagent Kit Lot #:  
 Chip Comments:

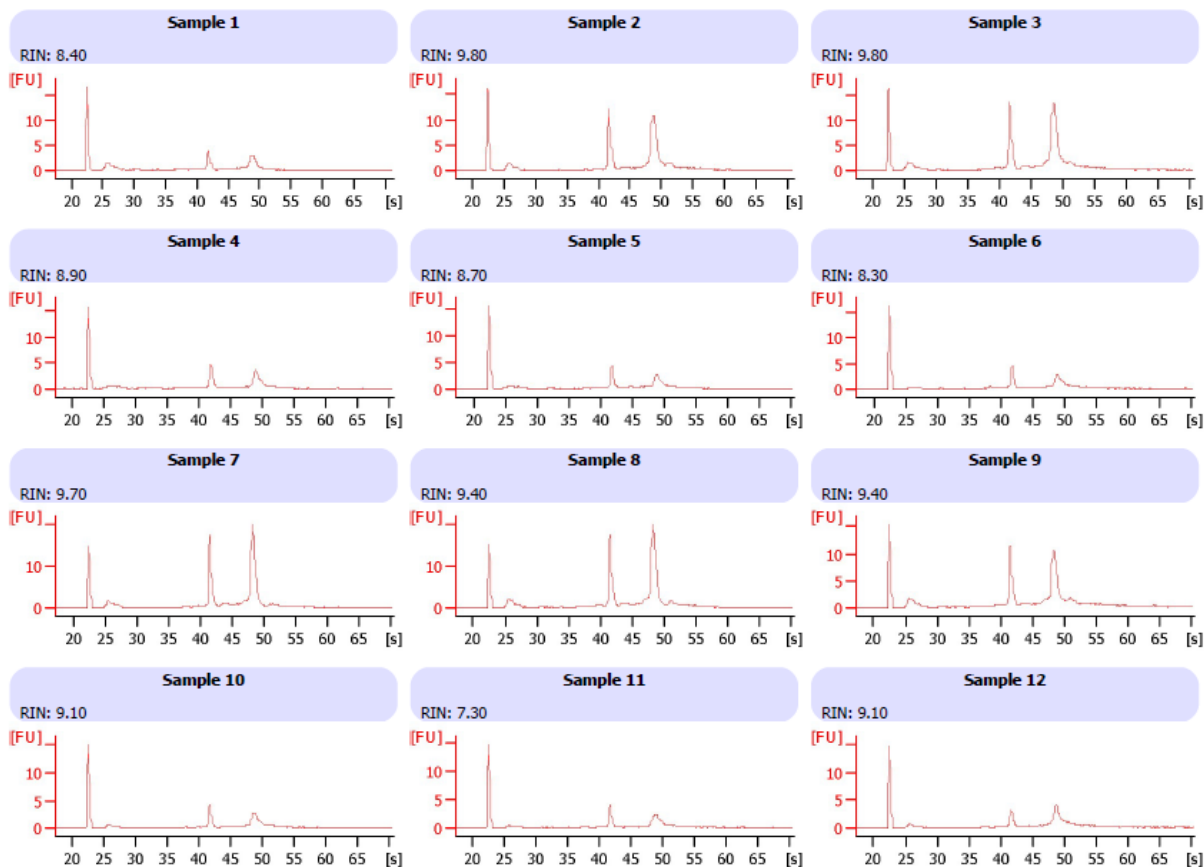

### Electrophoresis File Run Summary (Chip Summary)

| Sample Name | Sample Comment | Status | Result Label      | Result Color |
|-------------|----------------|--------|-------------------|--------------|
| Sample 1    |                | ✓      | RIN: 8.40         |              |
| Sample 2    |                | ✓      | RIN: 9.80         |              |
| Sample 3    |                | ✓      | RIN: 9.80         |              |
| Sample 4    |                | ✓      | RIN: 8.90         |              |
| Sample 5    |                | ✓      | RIN: 8.70         |              |
| Sample 6    |                | ✓      | RIN: 8.30         |              |
| Sample 7    |                | ✓      | RIN: 9.70         |              |
| Sample 8    |                | ✓      | RIN: 9.40         |              |
| Sample 9    |                | ✓      | RIN: 9.40         |              |
| Sample 10   |                | ✓      | RIN: 9.10         |              |
| Sample 11   |                | ✓      | RIN: 7.30         |              |
| Sample 12   |                | ✓      | RIN: 9.10         |              |
| Ladder      |                | ✓      | All Other Samples |              |

Sample 1

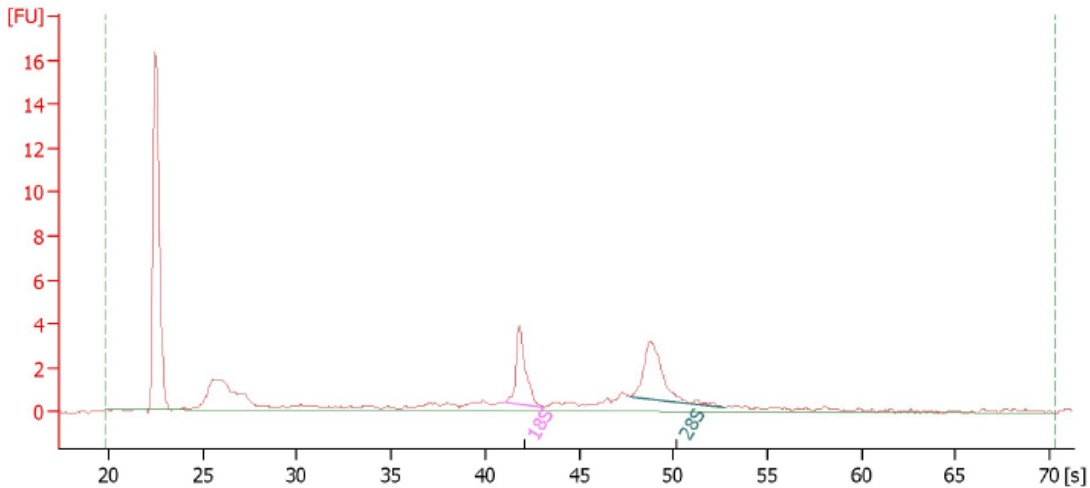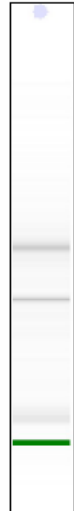

**Overall Results for sample 1 :** Sample 1

|                         |          |                             |                                                                                                                             |
|-------------------------|----------|-----------------------------|-----------------------------------------------------------------------------------------------------------------------------|
| RNA Area:               | 41,6     | RNA Integrity Number (RIN): | 8.4 (B.02.08)                                                                                                               |
| RNA Concentration:      | 19 ng/µl | Result Flagging Color:      | <span style="background-color: #ccccff; border: 1px solid black; display: inline-block; width: 20px; height: 10px;"></span> |
| rRNA Ratio [28s / 18s]: | 1,3      | Result Flagging Label:      | RIN: 8.40                                                                                                                   |

**Fragment table for sample 1 :** Sample 1

| Name | Start Time [s] | End Time [s] | Area | % of total Area |
|------|----------------|--------------|------|-----------------|
| 18S  | 41,08          | 43,17        | 4,9  | 11,8            |
| 28S  | 47,70          | 52,74        | 6,4  | 15,3            |

Sample 2

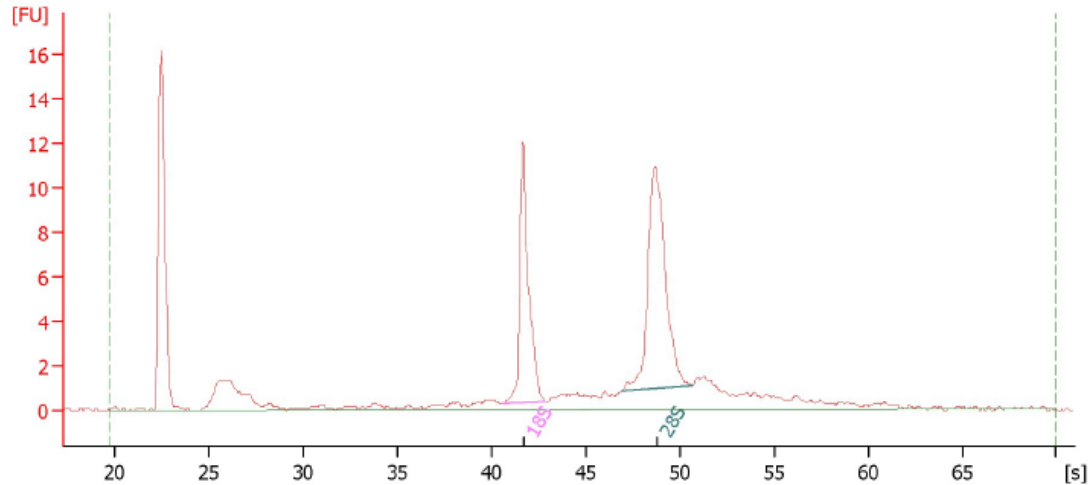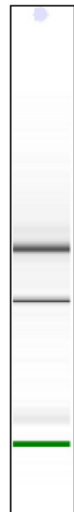

**Overall Results for sample 2 :** Sample 2

|                         |          |                             |                                                                                                                             |
|-------------------------|----------|-----------------------------|-----------------------------------------------------------------------------------------------------------------------------|
| RNA Area:               | 78,3     | RNA Integrity Number (RIN): | 9.8 (B.02.08)                                                                                                               |
| RNA Concentration:      | 37 ng/µl | Result Flagging Color:      | <span style="background-color: #ccccff; border: 1px solid black; display: inline-block; width: 20px; height: 10px;"></span> |
| rRNA Ratio [28s / 18s]: | 1,5      | Result Flagging Label:      | RIN: 9.80                                                                                                                   |

**Fragment table for sample 2 :** Sample 2

| Name | Start Time [s] | End Time [s] | Area | % of total Area |
|------|----------------|--------------|------|-----------------|
| 18S  | 40,59          | 42,87        | 15,1 | 19,3            |
| 28S  | 46,93          | 50,73        | 22,0 | 28,1            |

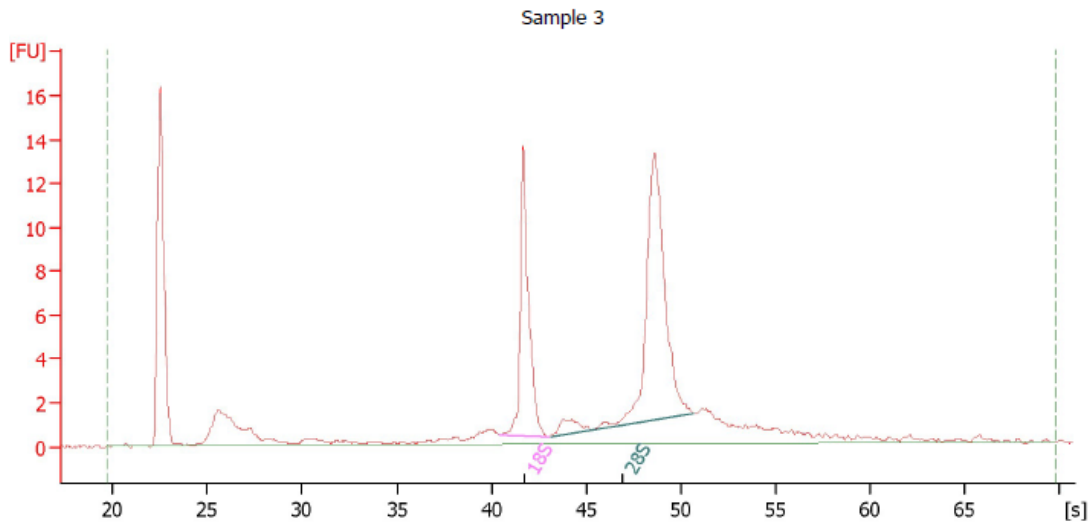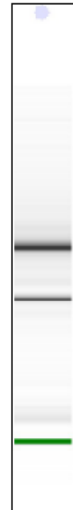

**Overall Results for sample 3 :** Sample 3

|                         |                |                             |                                                                                                                             |
|-------------------------|----------------|-----------------------------|-----------------------------------------------------------------------------------------------------------------------------|
| RNA Area:               | 94,2           | RNA Integrity Number (RIN): | 9.8 (B.02.08)                                                                                                               |
| RNA Concentration:      | 44 ng/ $\mu$ l | Result Flagging Color:      | <span style="background-color: #ccccff; border: 1px solid black; display: inline-block; width: 20px; height: 10px;"></span> |
| rRNA Ratio [28s / 18s]: | 1,8            | Result Flagging Label:      | RIN: 9.80                                                                                                                   |

**Fragment table for sample 3 :** Sample 3

| Name | Start Time [s] | End Time [s] | Area | % of total Area |
|------|----------------|--------------|------|-----------------|
| 18S  | 40,45          | 43,03        | 16,1 | 17,1            |
| 28S  | 43,13          | 50,71        | 29,8 | 31,6            |

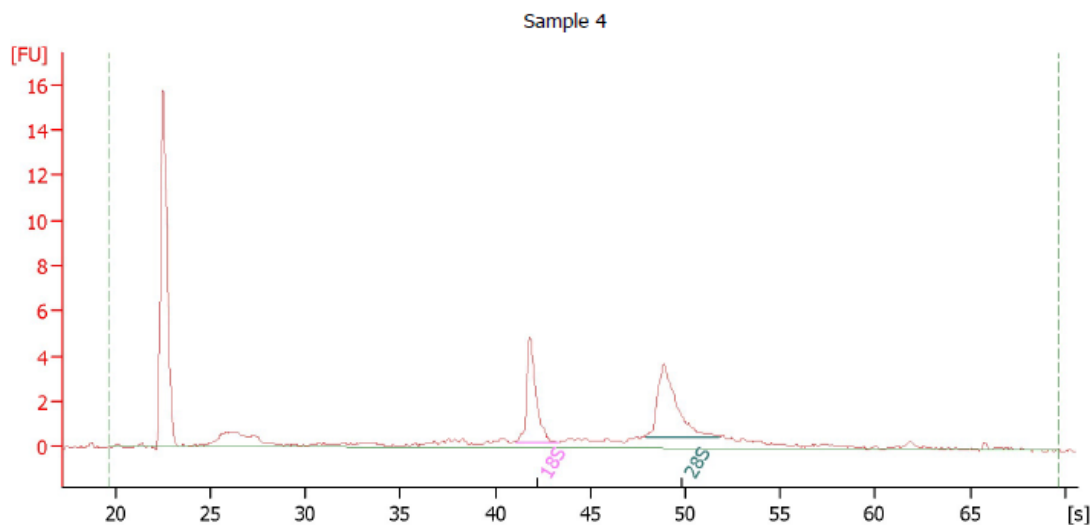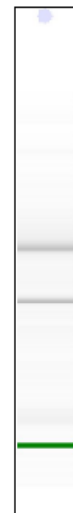

**Overall Results for sample 4 :** Sample 4

|                         |                |                             |                                                                                                                             |
|-------------------------|----------------|-----------------------------|-----------------------------------------------------------------------------------------------------------------------------|
| RNA Area:               | 41,4           | RNA Integrity Number (RIN): | 8.9 (B.02.08)                                                                                                               |
| RNA Concentration:      | 19 ng/ $\mu$ l | Result Flagging Color:      | <span style="background-color: #ccccff; border: 1px solid black; display: inline-block; width: 20px; height: 10px;"></span> |
| rRNA Ratio [28s / 18s]: | 1,2            | Result Flagging Label:      | RIN: 8.90                                                                                                                   |

**Fragment table for sample 4 :** Sample 4

| Name | Start Time [s] | End Time [s] | Area | % of total Area |
|------|----------------|--------------|------|-----------------|
| 18S  | 41,07          | 43,34        | 6,0  | 14,5            |
| 28S  | 47,93          | 51,81        | 7,4  | 17,9            |

Sample 5

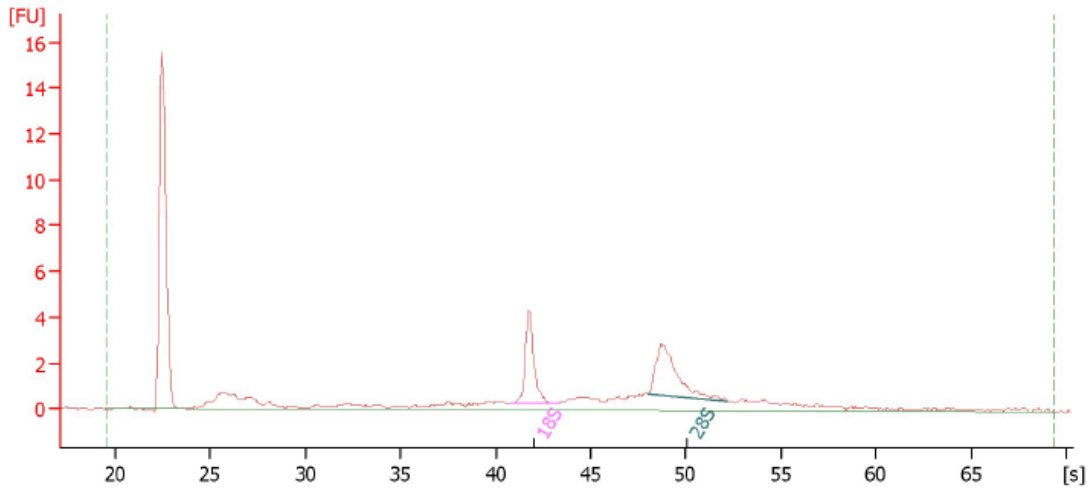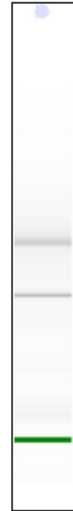

**Overall Results for sample 5 :** Sample 5

|                         |          |                             |                                                                                                                             |
|-------------------------|----------|-----------------------------|-----------------------------------------------------------------------------------------------------------------------------|
| RNA Area:               | 41,4     | RNA Integrity Number (RIN): | 8.7 (B.02.08)                                                                                                               |
| RNA Concentration:      | 19 ng/μl | Result Flagging Color:      | <span style="background-color: #ccccff; border: 1px solid black; display: inline-block; width: 20px; height: 10px;"></span> |
| rRNA Ratio [28s / 18s]: | 1,1      | Result Flagging Label:      | RIN: 8.70                                                                                                                   |

**Fragment table for sample 5 :** Sample 5

| Name | Start Time [s] | End Time [s] | Area | % of total Area |
|------|----------------|--------------|------|-----------------|
| 18S  | 40,78          | 43,29        | 5,1  | 12,2            |
| 28S  | 47,96          | 52,18        | 5,8  | 14,1            |

Sample 6

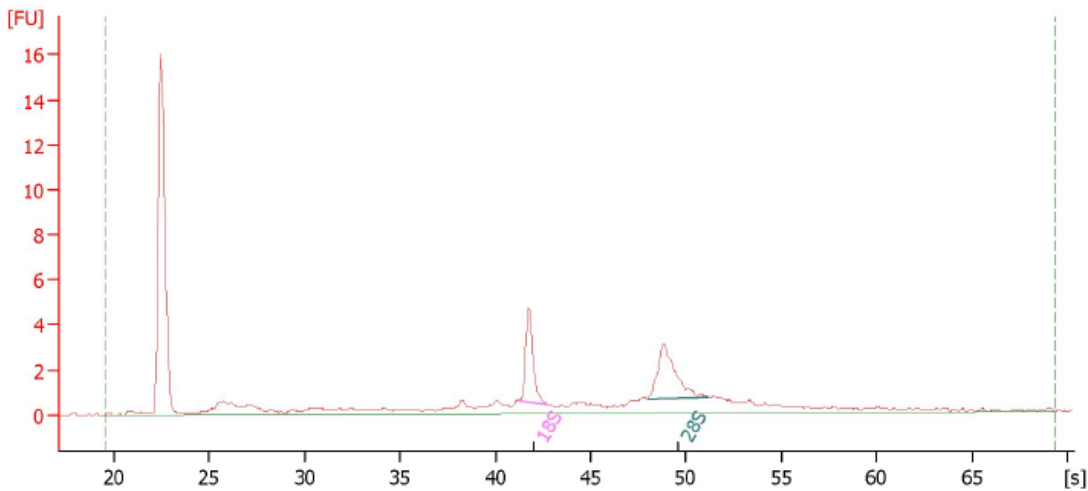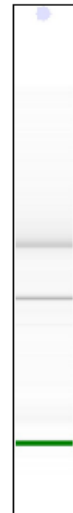

**Overall Results for sample 6 :** Sample 6

|                         |          |                             |                                                                                                                             |
|-------------------------|----------|-----------------------------|-----------------------------------------------------------------------------------------------------------------------------|
| RNA Area:               | 41,2     | RNA Integrity Number (RIN): | 8.3 (B.02.08)                                                                                                               |
| RNA Concentration:      | 19 ng/μl | Result Flagging Color:      | <span style="background-color: #ccccff; border: 1px solid black; display: inline-block; width: 20px; height: 10px;"></span> |
| rRNA Ratio [28s / 18s]: | 1,3      | Result Flagging Label:      | RIN: 8.30                                                                                                                   |

**Fragment table for sample 6 :** Sample 6

| Name | Start Time [s] | End Time [s] | Area | % of total Area |
|------|----------------|--------------|------|-----------------|
| 18S  | 41,23          | 42,74        | 4,3  | 10,4            |
| 28S  | 47,96          | 51,18        | 5,4  | 13,2            |

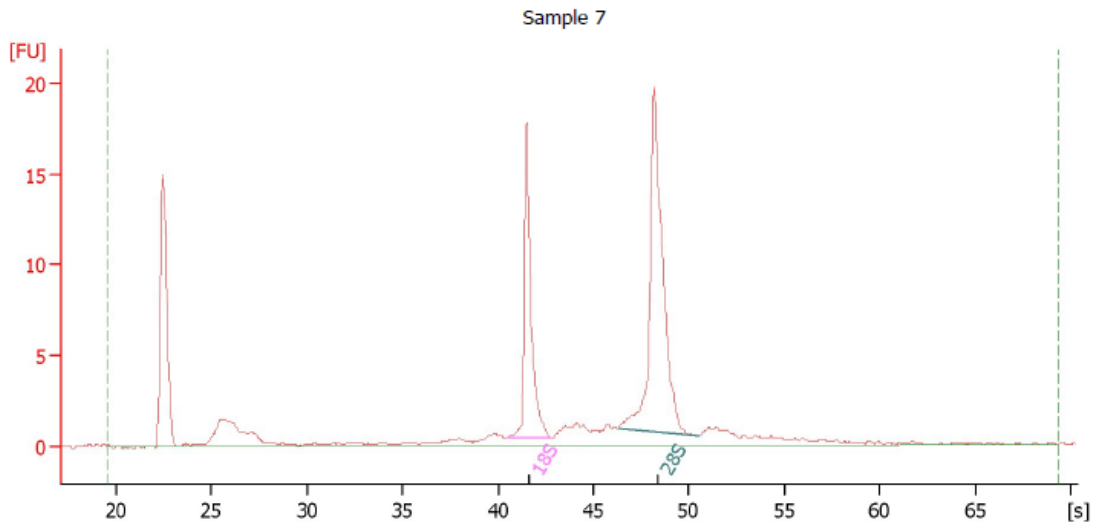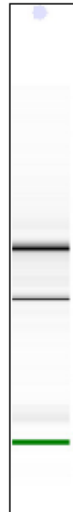

**Overall Results for sample 7 :** Sample 7

|                         |                |                             |                                                                                                                             |
|-------------------------|----------------|-----------------------------|-----------------------------------------------------------------------------------------------------------------------------|
| RNA Area:               | 86,6           | RNA Integrity Number (RIN): | 9.7 (B.02.08)                                                                                                               |
| RNA Concentration:      | 41 ng/ $\mu$ l | Result Flagging Color:      | <span style="background-color: #ccccff; border: 1px solid black; display: inline-block; width: 20px; height: 10px;"></span> |
| rRNA Ratio [28s / 18s]: | 1,8            | Result Flagging Label:      | RIN: 9.70                                                                                                                   |

**Fragment table for sample 7 :** Sample 7

| Name | Start Time [s] | End Time [s] | Area | % of total Area |
|------|----------------|--------------|------|-----------------|
| 18S  | 40,48          | 42,79        | 17,1 | 19,7            |
| 28S  | 46,31          | 50,52        | 31,5 | 36,4            |

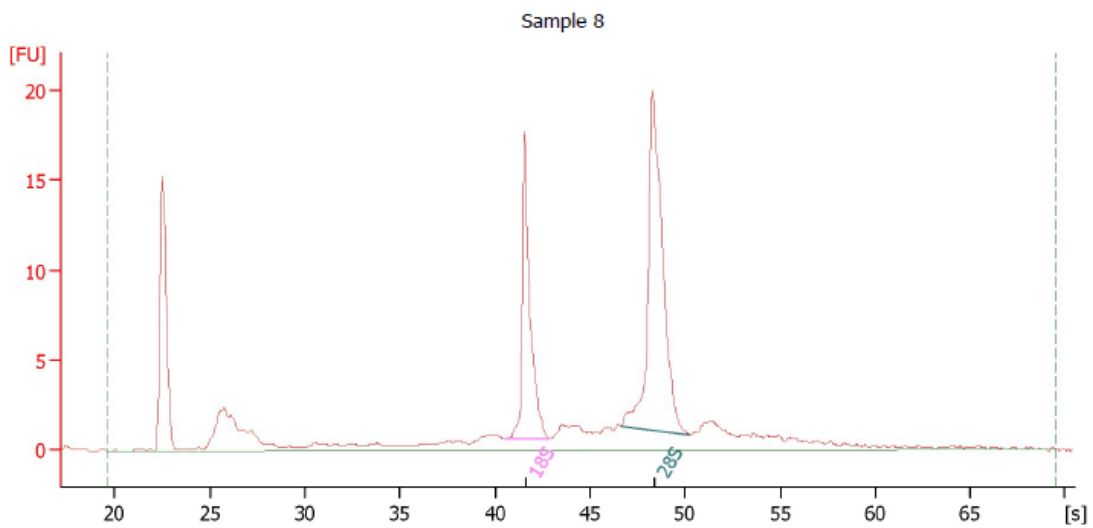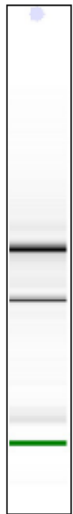

**Overall Results for sample 8 :** Sample 8

|                         |                |                             |                                                                                                                             |
|-------------------------|----------------|-----------------------------|-----------------------------------------------------------------------------------------------------------------------------|
| RNA Area:               | 115,5          | RNA Integrity Number (RIN): | 9.4 (B.02.08)                                                                                                               |
| RNA Concentration:      | 54 ng/ $\mu$ l | Result Flagging Color:      | <span style="background-color: #ccccff; border: 1px solid black; display: inline-block; width: 20px; height: 10px;"></span> |
| rRNA Ratio [28s / 18s]: | 1,8            | Result Flagging Label:      | RIN: 9.40                                                                                                                   |

**Fragment table for sample 8 :** Sample 8

| Name | Start Time [s] | End Time [s] | Area | % of total Area |
|------|----------------|--------------|------|-----------------|
| 18S  | 40,47          | 42,89        | 19,4 | 16,8            |
| 28S  | 46,61          | 50,23        | 35,2 | 30,5            |

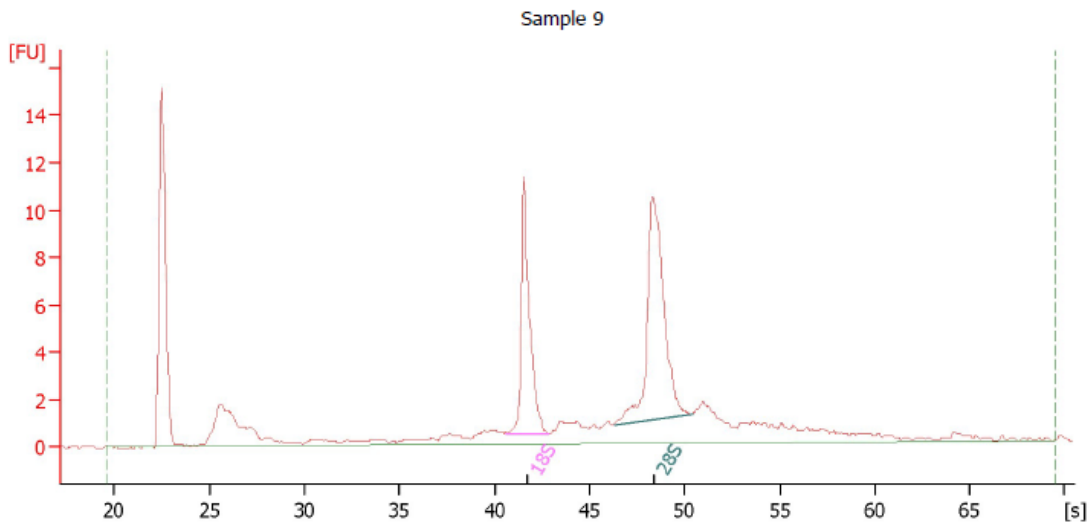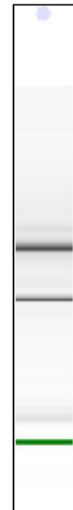

**Overall Results for sample 9 : Sample 9**

|                         |                |                             |                                                                                                                             |
|-------------------------|----------------|-----------------------------|-----------------------------------------------------------------------------------------------------------------------------|
| RNA Area:               | 84,7           | RNA Integrity Number (RIN): | 9.4 (B.02.08)                                                                                                               |
| RNA Concentration:      | 40 ng/ $\mu$ l | Result Flagging Color:      | <span style="background-color: #ccccff; border: 1px solid black; display: inline-block; width: 20px; height: 10px;"></span> |
| rRNA Ratio [28s / 18s]: | 1,5            | Result Flagging Label:      | RIN: 9.40                                                                                                                   |

**Fragment table for sample 9 : Sample 9**

| Name | Start Time [s] | End Time [s] | Area | % of total Area |
|------|----------------|--------------|------|-----------------|
| 18S  | 40,62          | 42,89        | 13,1 | 15,5            |
| 28S  | 46,31          | 50,44        | 20,1 | 23,7            |

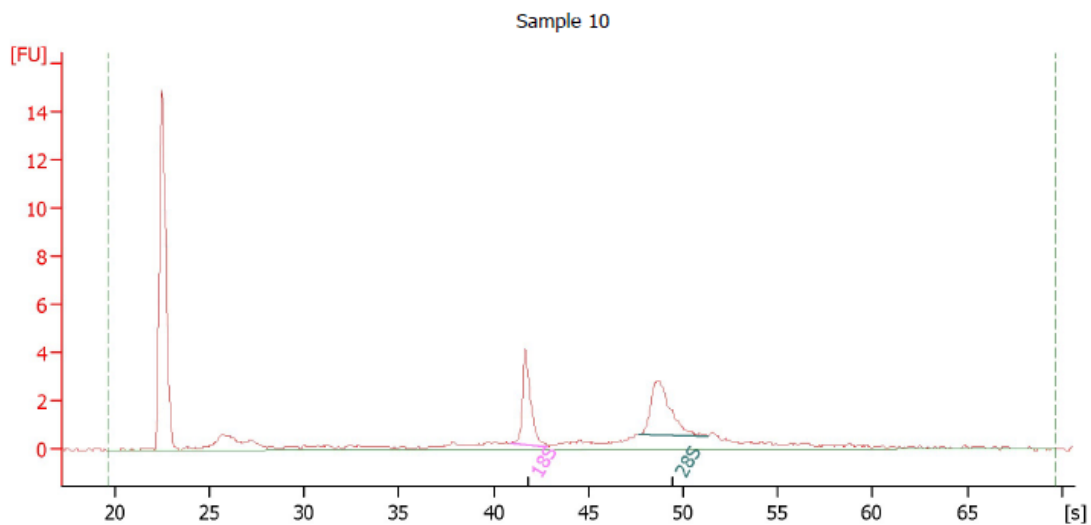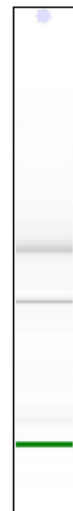

**Overall Results for sample 10 : Sample 10**

|                         |                |                             |                                                                                                                             |
|-------------------------|----------------|-----------------------------|-----------------------------------------------------------------------------------------------------------------------------|
| RNA Area:               | 32,5           | RNA Integrity Number (RIN): | 9.1 (B.02.08)                                                                                                               |
| RNA Concentration:      | 15 ng/ $\mu$ l | Result Flagging Color:      | <span style="background-color: #ccccff; border: 1px solid black; display: inline-block; width: 20px; height: 10px;"></span> |
| rRNA Ratio [28s / 18s]: | 1,2            | Result Flagging Label:      | RIN: 9.10                                                                                                                   |

**Fragment table for sample 10 : Sample 10**

| Name | Start Time [s] | End Time [s] | Area | % of total Area |
|------|----------------|--------------|------|-----------------|
| 18S  | 40,91          | 42,88        | 4,7  | 14,5            |
| 28S  | 47,62          | 51,31        | 5,6  | 17,3            |

Sample 11

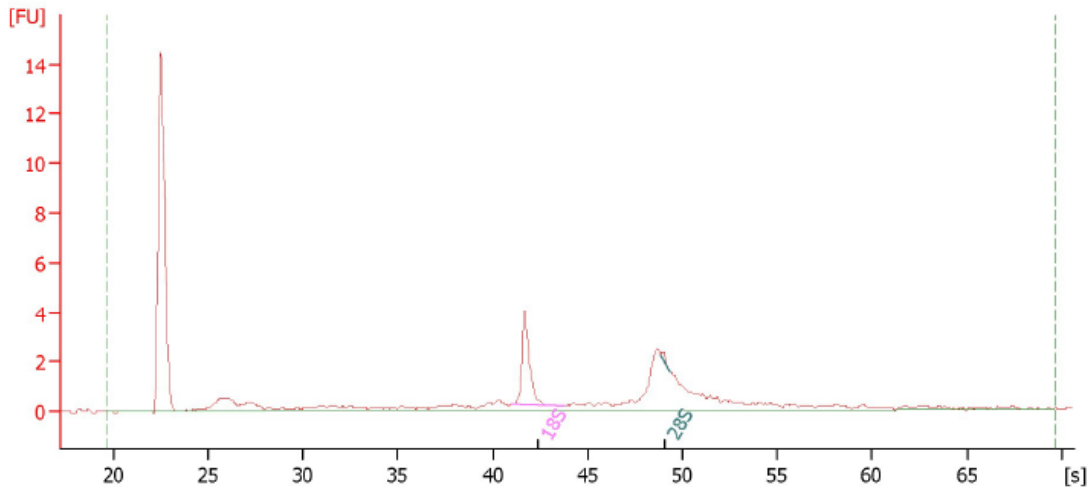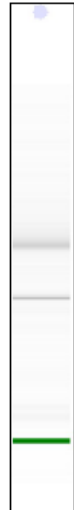

**Overall Results for sample 11 :** Sample 11

RNA Area: 30,8                      RNA Integrity Number (RIN): 7.3 (B.02.08)  
 RNA Concentration: 14 ng/μl              Result Flagging Color:   
 rRNA Ratio [28s / 18s]: 0,0              Result Flagging Label: RIN: 7.30

**Fragment table for sample 11 :** Sample 11

| Name | Start Time [s] | End Time [s] | Area | % of total Area |
|------|----------------|--------------|------|-----------------|
| 18S  | 41,01          | 43,79        | 4,2  | 13,6            |
| 28S  | 48,83          | 49,34        | 0,2  | 0,6             |

Sample 12

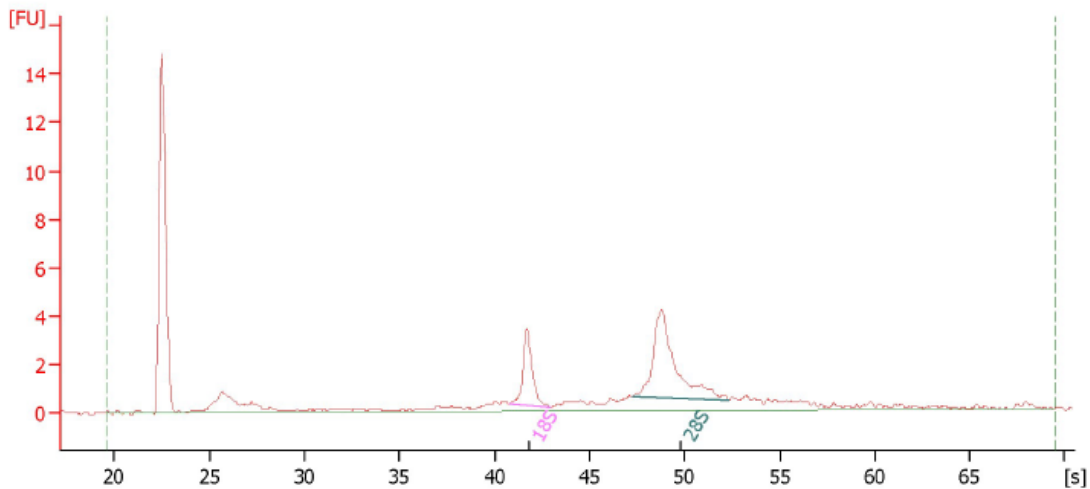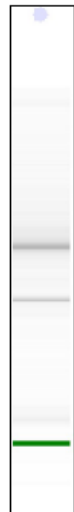

**Overall Results for sample 12 :** Sample 12

RNA Area: 39,0                      RNA Integrity Number (RIN): 9.1 (B.02.08)  
 RNA Concentration: 18 ng/μl              Result Flagging Color:   
 rRNA Ratio [28s / 18s]: 2,4              Result Flagging Label: RIN: 9.10

**Fragment table for sample 12 :** Sample 12

| Name | Start Time [s] | End Time [s] | Area | % of total Area |
|------|----------------|--------------|------|-----------------|
| 18S  | 40,82          | 42,94        | 4,2  | 10,7            |
| 28S  | 47,27          | 52,35        | 10,0 | 25,6            |
